# Supplementary material for: Hospital Services to Improve Nutritional Intake and Reduce Food Waste: A Systematic Review
Source: MDPI journal article supplement (doi:10.3390/nu15020310), 2023-01-07
Supplement: s1 [file s1]

## Supplementary file

**Table S1:** Full search strategies for electronic databases

|                        |                                                                                              |                |
|------------------------|----------------------------------------------------------------------------------------------|----------------|
| <b>Database</b>        | <b>PUBMED (Medline)</b>                                                                      |                |
| <b>Date</b>            | <b>29.06.2022</b>                                                                            |                |
| <b>Search strategy</b> |                                                                                              | <b>Results</b> |
| <b>#1</b>              | (HOSPITAL AND FOOD) OR (MEAL AND SERVICE) OR (HOSPITAL AND MEALS) OR (HOSPITAL AND CATERING) | 146,086        |
| <b>#2</b>              | (FOOD AND WASTE) OR (PLATE AND WASTE) OR (PROTEIN AND INTAKE) OR (ENERGY AND INTAKE)         | 24,252         |
| <b>#3</b>              | #1 AND #2                                                                                    | 862            |
| <b>Database</b>        | <b>WEB OF SCIENCE</b>                                                                        |                |
| <b>Date</b>            | <b>29.06.2022</b>                                                                            |                |
| <b>Search strategy</b> |                                                                                              | <b>Results</b> |
| <b>#1</b>              | (HOSPITAL AND FOOD) OR (MEAL AND SERVICE) OR (HOSPITAL AND MEALS) OR (HOSPITAL AND CATERING) | 17,880         |
| <b>#2</b>              | (FOOD AND WASTE) OR (PLATE AND WASTE) OR (PROTEIN AND INTAKE) OR (ENERGY AND INTAKE)         | 42,087         |
| <b>#3</b>              | #1 AND #2                                                                                    | 847            |
| <b>Database</b>        | <b>SCOPUS</b>                                                                                |                |
| <b>Date</b>            | <b>29.06.2022</b>                                                                            |                |
| <b>Search strategy</b> |                                                                                              | <b>Results</b> |
| <b>#1</b>              | (HOSPITAL AND FOOD) OR (MEAL AND SERVICE) OR (HOSPITAL AND MEALS) OR (HOSPITAL AND CATERING) | 52,087         |
| <b>#2</b>              | (FOOD AND WASTE) OR (PLATE AND WASTE) OR (PROTEIN AND INTAKE) OR (ENERGY AND INTAKE)         | 45,170         |
| <b>#3</b>              | #1 AND #2                                                                                    | 1324           |

**Table S2.** Quality assessment of the observational studies according to the Newcastle-Ottawa Scale

|                                | Selection                                   |                                        |                              |                                                                             | Comparability                                                                                 | Outcome                                                                                                                                                                               |                                                     |                                     |                  |
|--------------------------------|---------------------------------------------|----------------------------------------|------------------------------|-----------------------------------------------------------------------------|-----------------------------------------------------------------------------------------------|---------------------------------------------------------------------------------------------------------------------------------------------------------------------------------------|-----------------------------------------------------|-------------------------------------|------------------|
| First author, publication year | 1) Representativeness of the exposed cohort | 2) Selection of the non-exposed cohort | 3) Ascertainment of exposure | 4) Demonstration that outcome of interest was not present at start of study | 5) Comparability of cohorts on the basis of the design or analysis controlled for confounders | 6) Assessment of outcome                                                                                                                                                              | 7) Was follow-up long enough for outcomes to occur? | 8) Adequacy of follow-up of cohorts | 9) Quality score |
| Hartwell, 2003                 | *                                           | *                                      | *                            | *                                                                           | **                                                                                            | *                                                                                                                                                                                     | *                                                   | *                                   | Good             |
| Edwards, 2006                  | Reduced sample size                         | *                                      | *                            | *                                                                           | **                                                                                            | *                                                                                                                                                                                     | *                                                   | *                                   | Good             |
| Hickson, 2007                  | Reduced sample size                         | *                                      | *                            | *                                                                           | **                                                                                            | *                                                                                                                                                                                     | *                                                   | *                                   | Good             |
| Hickson, 2011                  | *                                           | *                                      | *                            | *                                                                           | **                                                                                            | *                                                                                                                                                                                     | *                                                   | *                                   | Good             |
| Manning, 2012                  | Reduced sample size                         | *                                      | *                            | *                                                                           | **                                                                                            | *                                                                                                                                                                                     | *                                                   |                                     | Good             |
| Young, 2012                    | *                                           | *                                      | Pre - post study design      | *                                                                           | **                                                                                            | -estimation of the energy requirements of individual participants rather than measurement using indirect calorimetry -assessment of food intake on only one day of hospital admission | *                                                   | *                                   | Good             |

|                  | Selection                                                                                     |   |                         |   | Comparability                                                         | Outcome                                                                                         |   |                                                                         |      |
|------------------|-----------------------------------------------------------------------------------------------|---|-------------------------|---|-----------------------------------------------------------------------|-------------------------------------------------------------------------------------------------|---|-------------------------------------------------------------------------|------|
| Maunder, 2015    | *                                                                                             | * | *                       | * | **                                                                    | *                                                                                               | * | *                                                                       | Good |
| Collins, 2016    | Reduced sample size (pilot study)                                                             | * | *                       | * | **                                                                    | *                                                                                               | * | *                                                                       | Good |
| Navarro, 2016    | *                                                                                             | * | *                       | * | **                                                                    | *                                                                                               | * | *                                                                       | Good |
| Farrer, 2016     | reduced sample size (high withdrawal rate due to patients not meeting the inclusion criteria) | * | *                       | * | * confounders to consider: age, gender, reasons for purea diet        | responses mostly collected <b>verbally</b> from patients or their relatives by the investigator | * | high withdrawal rate due to patients not meeting the inclusion criteria | Fair |
| Strotmann, 2017  | *                                                                                             | * | Pre - post study design | * | *                                                                     | *                                                                                               | * | the reference and control measurements took place in different seasons  | Good |
| Barrington, 2018 | *                                                                                             | * | *                       | * | **                                                                    | *                                                                                               | * | *                                                                       | Good |
| McCray, 2018a    | *                                                                                             | * | *                       | * | * cohort different in terms of age, weight and medical classification | *                                                                                               | * | retrospective analysis of quality audit data over a 2.5-year period     | Good |

|                | Selection |   |   |   | Comparability                                                            | Outcome                                  |   |   |      |
|----------------|-----------|---|---|---|--------------------------------------------------------------------------|------------------------------------------|---|---|------|
| Mc Cray, 2018b | *         | * | * | * | confounders to consider: age, medical classification                     | *                                        | * | * | Good |
| Neaves, 2021   | *         | * | * | * | age statistically different between thaw-retherm and room service groups | *                                        | * | * | Good |
| Razalli, 2021  | *         | * | * | * | **                                                                       | *                                        | * | * | Good |
| Berardy, 2022  | *         | * | * | * | *                                                                        | no measurement s of initial food weights | * | * | Good |

**Abbreviations: “\*” means one star; “\*\*” means two stars; ND, not determined**

Good quality: 3 or 4 stars in the selection domain AND 1 or 2 stars in the comparability domain AND 2 or 3 stars in the outcome domain

Fair quality: 2 stars in the selection domain AND 1 or 2 stars in the comparability domain AND 2 or 3 stars in the outcome domain

Poor quality: 0 or 1 star in the selection domain OR 0 stars in the comparability domain OR 0 or 1 star in the outcome/exposure domain

**Table S3.** Quality assessment of two randomized controlled trials according to the Cochrane Risk of Bias tool from Cochrane Handbook for Systematic Reviews of Interventions

| <b>First author,<br/>publication<br/>year</b> | <b>Random<br/>sequence<br/>generation</b> | <b>Allocation<br/>concealment</b> | <b>Blinding of<br/>participants<br/>and personnel</b> | <b>Blinding of<br/>outcome<br/>assessment</b> | <b>Incomplete<br/>outcome data<br/>addressed</b> | <b>Selective<br/>reporting</b> | <b>Other potential<br/>biases</b> |
|-----------------------------------------------|-------------------------------------------|-----------------------------------|-------------------------------------------------------|-----------------------------------------------|--------------------------------------------------|--------------------------------|-----------------------------------|
| Rufenacht, 2010                               | -                                         | -                                 | + due to the<br>nature of<br>intervention             | ?                                             | -                                                | -                              | ?                                 |
| Porter, 2017                                  | -                                         | -                                 | +                                                     | ?                                             | -                                                | -                              | -                                 |

-, low risk of bias; ?, unclear ; +, high risk of bias
